# Supplementary material for: Low HER2 expression is a predictor of poor prognosis in stage I triple-negative breast cancer
Source: PubMed Central journal article supplement (PMC10083471; doi:10.3389/fonc.2023.1157789), 2023-03-27
Supplement: Table_1.pdf [file Table_1.pdf]

## *Supplementary Material*

### **Low HER2 expression is a predictor of poor prognosis in stage I triple-negative breast cancer**

**Tomomi Sanomachi<sup>1</sup>, Hitomi Sumiyoshi Okuma<sup>1</sup>, Rui Kitadai<sup>1</sup>, Asuka Kawachi<sup>1</sup>, Shu Yazaki<sup>1</sup>, Momoko Tokura<sup>1</sup>, Motoko Arakaki<sup>1</sup>, Ayumi Saito<sup>1</sup>, Shosuke Kita<sup>1</sup>, Kasumi Yamamoto<sup>1</sup>, Aiko Maejima<sup>1</sup>, Yuki Kojima<sup>1</sup>, Tadaaki Nishikawa<sup>1</sup>, Kazuki Sudo<sup>1</sup>, Tatsunori Shimoi<sup>1</sup>, Emi Noguchi<sup>1</sup>, Yasuhiro Fujiwara<sup>1</sup>, Hirokazu Sugino<sup>2</sup>, Sho Shiino<sup>3</sup>, Akihiko Suto<sup>3</sup>, Masayuki Yoshida<sup>2</sup>, Kan Yonemori<sup>1</sup>**

\* **Correspondence:** Hitomi Sumiyoshi Okuma MD, PhD: [hsumiyos@ncc.go.jp](mailto:hsumiyos@ncc.go.jp)

#### **1 Supplementary Tables**

**Supplementary Table 1.** HER2 status of 42 cases. Two pathologists reviewed HER2 status using the ASCO/CAP2018 criteria. The agreement between the final HER2 status and medical records was 39/42 cases (92.9%). 10 cases were stained with CB11 and 32 cases with HercepTest II.

| Patient number | At or before diagnosis<br>(ASCO/CAP2007) | Pathologist 1<br>At diagnosis<br>(ASCO/CAP2018) | Pathologist 2<br>At diagnosis<br>(ASCO/CAP2018) | Consensus between pathologists 1 & 2 |
|----------------|------------------------------------------|-------------------------------------------------|-------------------------------------------------|--------------------------------------|
| 1              | 0                                        | 0                                               | 0                                               | 0                                    |
| 2              | 0                                        | 0                                               | 0                                               | 0                                    |
| 3              | 0                                        | 0                                               | 0                                               | 0                                    |
| 4              | 0                                        | 0                                               | 0                                               | 0                                    |
| 5              | 0                                        | 0                                               | 0                                               | 0                                    |
| 6              | 0                                        | 0                                               | 0                                               | 0                                    |
| 7              | 0                                        | 0                                               | 0                                               | 0                                    |

|    |    |    |         |    |
|----|----|----|---------|----|
| 8  | 0  | 1+ | 0 or 1+ | 1+ |
| 9  | 0  | 0  | 0       | 0  |
| 10 | 0  | 0  | 0       | 0  |
| 11 | 0  | 0  | 0       | 0  |
| 12 | 0  | 0  | 0       | 0  |
| 13 | 1+ | 1+ | 1+      | 1+ |
| 14 | 0  | 0  | 0       | 0  |
| 15 | 0  | 0  | 0       | 0  |
| 16 | 0  | 0  | 0       | 0  |
| 17 | 0  | 0  | 0       | 0  |
| 18 | 0  | 0  | 0       | 0  |
| 19 | 0  | 0  | 0       | 0  |
| 20 | 0  | 0  | 0       | 0  |
| 21 | 0  | 0  | 0       | 0  |
| 22 | 0  | 0  | 0       | 0  |
| 23 | 0  | 0  | 0       | 0  |
| 24 | 0  | 0  | 0       | 0  |
| 25 | 0  | 0  | 0       | 0  |
| 26 | 0  | 0  | 0       | 0  |
| 27 | 0  | 0  | 0       | 0  |

|    |                    |    |    |                 |
|----|--------------------|----|----|-----------------|
| 28 | 0                  | 0  | 0  | 0               |
| 29 | 0 (intraductal 1+) | 0  | 0  | 0               |
| 30 | 1+                 | 1+ | 1+ | 1+              |
| 31 | 1+                 | 2+ | 2+ | 2+/ISH negative |
| 32 | 0                  | 0  | 0  | 0               |
| 33 | 1+                 | 1+ | 1+ | 1+              |
| 34 | 1+                 | 1+ | 1+ | 1+              |
| 35 | 1+                 | 1+ | 1+ | 1+              |
| 36 | 1+                 | 1+ | 1+ | 1+              |
| 37 | 1+                 | 1+ | 1+ | 1+              |
| 38 | 1+                 | 1+ | 1+ | 1+              |
| 39 | 0                  | 0  | 0  | 0               |
| 40 | 0                  | 0  | 0  | 0               |
| 41 | 1+                 | 1+ | 1+ | 1+              |
| 42 | 1+                 | 0  | 0  | 0               |
